# Supplementary material for: White light-emitting ZnO:Dy3+ nanophosphors: delving into the spectroscopic parameters via Judd–Ofelt analysis
Source: Royal Society of Chemistry journal article supplement (doi:10.1039/d3dt04070d), 2024-01-01
Supplement: d3dt04070d1.pdf [file d3dt04070d1.pdf]

## White light emitting ZnO:Dy<sup>3+</sup> nanophosphors: Delving into the spectroscopic parameters via Judd-Ofelt analysis

Rajendran Raji<sup>a</sup>, Gopalan Jyothi<sup>c</sup>, Sajesh Sasidharan<sup>a</sup>, Kunnel Gopalan Gopchandran<sup>b</sup>

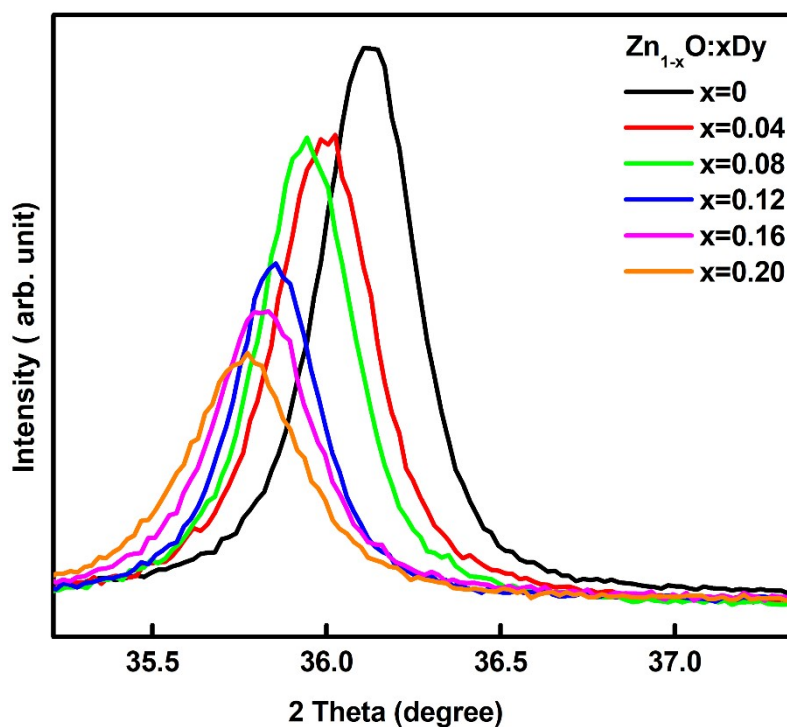

Fig. S1. Shift of XRD peak (101) with Dy content (0.04-0.20 at.%)

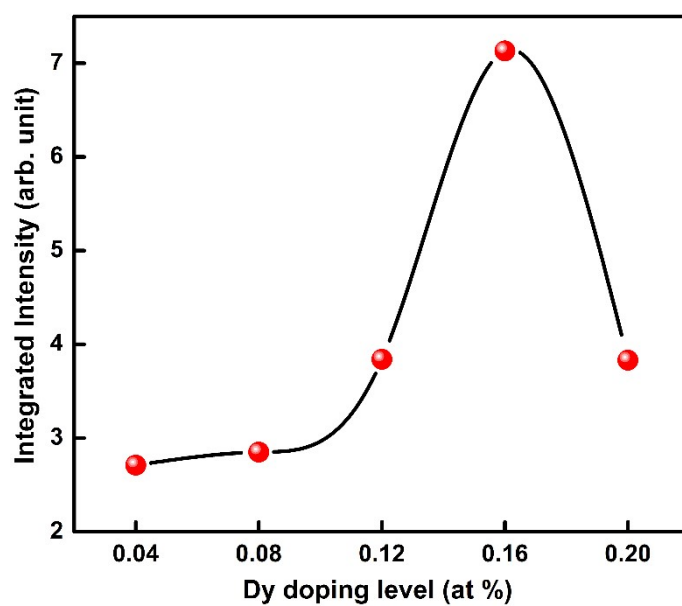

Fig S2. Variation of Integrated emission intensity with Dy content

### **Calculation of correlated color temperature (CCT)**

The correlated color temperature is calculated using McCamy method [42]:

$$CCT = 449n^3 + 3525n^2 + 6853.3n + 5520.33$$

where  $n = (x - x_e)/(y - y_e)$ ,  $(x_e, y_e)$  is found to be (0.3320, 0.1858),  $(x, y)$  are the color coordinates.
